27

## Abstract

28 One of the basics problems in ecology is to understand the factors that shape the spatial  
29 patterns in the distribution of the species and the coexistence of close relatives species.  
30 Among the most critical factors governing the distributions and the coexistence of  
31 species are the spatiotemporal changes occurring in the microhabitat heterogeneity.  
32 Here, we assessed the heterogeneity of microhabitats and how they affect the spatial  
33 segregation of two species of small mammals (*i. e.*, *Peromyscus difficilis* and *P.*  
34 *melanotis*), which coexist in a temperate, mixed forest. We evaluated the microhabitat  
35 heterogeneity through multivariate statistics, using onto 23 habitat variables describing  
36 horizontal-vertical habitat structure along pluvial seasons. To detect specific  
37 microdistribution changes and habitat preferences by two species of small mammals, we  
38 used second-order spatial statistics and general linear models. According to their  
39 respective morphology and locomotive adaptations, the middle sized, midscansorial *P.*  
40 *difficilis* was resident all year long and preferred microhabitats with a high log ground  
41 cover, while the opportunistic, small sized, cursorial *P. melanotis* changed its  
42 occupancy area, depending on the density of herbaceous and woody plants cover. Under  
43 the more benign microhabitat conditions of the rainy season (denser plant coverage,  
44 milder temperature), both species showed closer microdistribution patterns; while these  
45 became repulsive at the less favorable conditions of the dry season (scarcer plant cover,  
46 colder temperature). Thus, we could confirm that seasonal changes of microhabitat  
47 heterogeneity promoted *Peromyscus* coexistence, through dispersion patterns reflecting  
48 partition of microhabitat resources.

49

50 Keywords: Microhabitat selection, Use of space, Small mammals, Dispersion, Resource  
51 partition.

52

53

## Introduction

54

55 Spatiotemporal habitat heterogeneity has a substantial impact on coexistence among  
56 species since they become spatially segregated, according to niche preferences such as  
57 resource requirements (Valladares *et al.* 2015). Model simulations reveal the potentially  
58 important role of spatial heterogeneity and its complex and delicate interplay with  
59 dispersal in mediating long-term outcomes of species coexistence (Schreiber and  
60 Killingback 2013; Valladares *et al.* 2015). For example, an increase in the number of  
61 habitat types, resources, and structural complexity should increase the available niche  
62 space and thus allow more species to coexist (Currie 1991). Equally crucial for the  
63 maintenance of coexistence is the heterogeneity in time, with an influence on natural  
64 communities also variable depending upon the temporal scales (Valladares *et al.* 2015).  
65 Temporal fluctuations on habitat structure can stabilize coexistence via storage effect  
66 (Chesson 2000), when inter-annual variation in climate or resource availability favors  
67 alternatively one group of species over the others (Zavaleta *et al.* 2003). For instance,  
68 *Peromyscus* mice have been shown to respond to spatiotemporal habitat heterogeneity  
69 regarding species coexistence (M'Closkey and Fieldwick 1975; M'Closkey and Lajoie  
70 1975), spatial segregation (Monamy and Fox 1999), and competition (Morris 1984;  
71 Seagle 1985).

72 Heterogeneous habitats contain patches of varying size, distribution, resources,  
73 environmental conditions, and species composition (Fahrig and Merriam 1994) that  
74 vary spatiotemporally, depending on observation scale and habitat type under study  
75 (Wiens 2000). It is highly likely that small size species such as small mammals perceive  
76 spatial habitat heterogeneity at a fine scale (microhabitat). Therefore, both movement

77 and foraging by these kinds of mammals are affected by habitat heterogeneity (Bowne  
78 *et al.* 1999), having different responses among species or demographic groups within  
79 them (Dooley and Bowers 1996). Here we focus on whether small mammals are  
80 capable of perceiving and to respond to spatiotemporal microhabitat heterogeneity.

81 Small mammals use resources selectively, based on their requirements for  
82 growth, survival, and reproduction (Johnson and Gaines 1980). Several studies have  
83 quantified variation in resource use in heterogeneous environments either among  
84 congeneric and co-family mice species within a community (Kaufman and Kaufman  
85 1989 and references therein). Indeed, syntopic related species are especially valuable for  
86 studies of spatial and resource partitioning, since they are most likely to be current or  
87 past competitors (Kalcounis-Rüppell and Millar 2002). Since habitat use varies  
88 spatiotemporally (Haim and Rozenfeld 1993) due to distribution and availability of  
89 resources, we expect that such variation also affects the use of resources and  
90 relationships among non-closely related species. In this study, the primary objective is  
91 to analyze how heterogeneity of microhabitats is structured and change through pluvial  
92 seasons in a temperate, mixed forest, and how such changes affect the coexistence of  
93 two syntopic species of *Peromyscus* (*i. e.*, *P. difficilis* and *P. melanotis*). Therefore, 1)  
94 We assess the presence of the spatiotemporal heterogeneity at a fine scale  
95 (microhabitat) according to vertical and horizontal structure indicators. 2) We evaluate  
96 the ecological dispersion patterns of two species of *Peromyscus* and is tested if the use  
97 of space of the two small mammals is affected by the spatiotemporal changes in  
98 microhabitat heterogeneity. 3) We determine what kind of spatial relationships occur  
99 between both species, depending on seasonal changes in microhabitats heterogeneity (*i.*  
100 *e.*, attraction or positive: sharing of same microhabitats and resources; repulsion or  
101 negative: not sharing). Finally, we assessed which specific structural elements of each

102 one of the microhabitats better explain the capture frequency of the two *Peromyscus*  
103 species between seasons.

104

## 105 **Material and methods**

106

### 107 *Ethics statement*

108

109 Animal capture and handling followed guidelines of the American Society of  
110 Mammalogists (Sikes *et al.* 2011). If animals died, corpses were prepared as voucher  
111 specimens to house them at the Mammal Collection of the Universidad Autónoma  
112 Metropolitana-Iztapalapa (UAMI, Ramírez-Pulido *et al.* 1989). Collecting permit,  
113 SEMARNAT-08-049-B, was issued by DGVS, SGPA-09712/13, SEMARNAT, to  
114 Alondra Castro-Campillo (ACC).

115

### 116 *Study area*

117

118 The study area was located in a temperate forest of conifers and broad-leaved trees at  
119 Parque Nacional Desierto de Los Leones (PNDL, CONANP 2006), Mexico City, within  
120 the Transmexican Neovolcanic Range. Temperature averages  $12.6 \pm 6$  °C from April to  
121 July, while it descends to  $8.1 \pm 2$  °C from December to February. Rainfalls occur from  
122 late spring throughout summer (May to August), with average precipitation of  $235 \pm 30$   
123 mm, though this period can go until mid-fall (October). From winter to early spring  
124 (December to March), precipitation average becomes  $12 \pm 4$  mm, introducing a dry and  
125 cold climate (PNDL, CONANP 2006). Dominating vegetation by strata includes  
126 canopy, *Abies religiosa*, *Pinus hartwegii*, *P. leiophylla*, *P. montezumae*, *Prunus*

127 *serotina*, *Garrya laurifolia*, *Salix paradoxa*, and *Buddleia cordata*; understory shrubs,  
128 *Baccharis conferta* and *Senecio spp.*, and herbs, *Acaena elongata*, *Sigesbeckia*  
129 *zorullensis*, and *Alchemilla procumbens*; ground level, a rich variety of mosses and  
130 fungi.

131

132 *Mice sampling*

133

134 We captured mice along ten months (October 2013- August 2014), including the dry  
135 and wet seasons within a 2,475 m<sup>2</sup> surface plot (Fig. 1) at 2289 m. The plot was gridded  
136 (12 vertical lines, A-L; 10 horizontal lines, 1-10) marking intersections each 5 m with  
137 buried wood stakes (150x2.5x2.5 cm) to construct a coordinate system for independent  
138 sampling stations, where we set 120 Sherman live traps (Tallahassee, FL 32303, USA),  
139 baited with oat flakes and vanilla scent (Fig. 1). Traps were set for two continuous nights  
140 (2400 trap-nights), shortly before dusk, left open overnight, and checked at next day  
141 dawn. To avoid bias in the abundance and use of space of both *Peromyscus* during each  
142 sampling session, we used a temporal mark (gentian violet applied in the abdomen of  
143 the mice) to identify the captures and recaptures. If we saw signals that the gentian  
144 violet was disappearing in the abdomen of the mice, we applied it again. This temporal  
145 mark enabled us to count the net frequency of the individuals in each microhabitat. We  
146 carried out an initial analysis with the recaptures, and we found the same patterns that  
147 we obtained with the first frequency (without recaptures). Thus, for the analyses, we  
148 used only the first capture data for each of the 120 sampling stations during all trapping  
149 sessions. All the traps were cleaned, and bedding was changed at each trap check event.  
150 Also, all the traps were set randomly in each sampling station to avoid bias in frequency

151 quantification due to recurrence behavior or shyness of the mice to the trapping.

152 Coordinates of all trapped mice were recorded and the species and sex determined

153 through visual inspection.

154

155 *Microhabitat features*

156

157 To assess spatiotemporal heterogeneity of microhabitat within the entire plot, we

158 delimited an influence zone (sub-plot, Fig. 1; close-up, Fig. 1), drawing a rectangle of

159 2.5 m<sup>2</sup> around each sampling station. 23 variables were sampled (Table 1) once in each

160 influence zone in both seasons. The sampling of the entire plot took ten days, we

161 sampled one transect per day, starting at 9 am in the second week of the most

162 represented month of rains (July) and in February for the dry season (PNDL, CONANP

163 2006). These variables have been proved to be components of the vertical and

164 horizontal structure of the microhabitat. Also as factors affecting the distribution of

165 small mammals at fine scales (Morris 1984, 1987; Stapp 1997; Jorgensen 2004,

166 Coppeto *et al.* 2006; Villanueva-Hernández *et al.* 2017). Environmental variables

167 include vegetation coverage at different heights (VC10-100 cm), number of herbaceous

168 forms (FH11-15), and number of woody forms (VF21-25) at five different heights: 10,

169 25, 35, 50, and 100 cm, respectively. Rock coverage (RC), logs coverage which include

170 stumps and fallen trunks (CLO); coverage of organic matter (OM); coverage of bare soil

171 (BS); vegetation species richness (VR); total herbaceous plants (TH); total woody plants

172 (TW) and the number of burrows (BW) also were sampled (Table 1). Overall, these

173 variables provide information about possible refuges for the small mammals against

174 predators, some elements of microhabitat also imply spaces for resting, breeding, for

175 food resources and safe roads to move from one place to another, avoiding predation

176 risk (Jorgensen 2004). Detailed information about ecological meanings for each variable  
177 appears in Table 1.

178 We adapted Canfield's (1941) method of Line Intercept (LI) to measure all  
179 variables in each pluvial station, for it allows sampling within-plot variation and  
180 quantifies changes, both in plant species cover and height over time, by using transects  
181 located within a plot. We drew eight graduated transects (cm) from the respective  
182 influence zone of each station to cover the 2.5 m<sup>2</sup> sub-plots (Fig. 1); four 2.5 m transects  
183 were cardinally oriented (N, S, E, W), while the other four 3.30 m ones were diagonally  
184 oriented (NE, NW, SE, SW). Only plants intercepted by diagonal transects were  
185 counted for vegetation species richness, number of life forms at different heights  
186 (herbaceous and woody plants), and total herbaceous and woody plants; while all  
187 transects were used to measure plant coverage at different heights, as well as coverage  
188 of fixed elements (*i. e.*, rocks, logs, bare soil, dead organic matter). We calculated  
189 coverage percentage of each variable within the sub-plots with the formula  $\sum(Xi) \frac{100}{2400}$ ,  
190 where  $Xi$  is centimeters occupied by every plant in each transect, and 2400 equals total  
191 longitude (sum of the eight transects). We counted the number of woody and  
192 herbaceous plant life forms at different heights and burrows within each influence zone  
193 of every sampling station. We took each hole in the ground ca. 8-12 cm of diameter as a  
194 potential burrow for both *Peromyscus* (Álvarez-Castañeda 2005; Fernandez *et al.* 2010).

195

#### 196 *Statistical data analysis*

197

198 We standardized all variables and run statistical tests at  $p \leq 0.05$ . We did not found  
199 multicollinearity among the 23 variables which was assessed by examining the Variance



200 Inflation Factor (*i. e.*, all values were in a threshold <6) (Zar 1999). To identify and  
201 categorized microhabitat heterogeneity within the grid, we performed two independent  
202 Hierarchical Cluster Analysis (HCA) in JMP® (ver. 9, SAS Institute Inc., Cary, NC,  
203 1989-2007) for each season. These analyses enabled us to cluster the sample stations  
204 with similar characteristics according to the sampled variables for both seasons. We  
205 used Ward's method (1963) where the distance between two clusters is the ANOVA'  
206 sum of squares between them, added up over all variables. Visual inspection of the  
207 dendrogram and no drastic changes in the variance scree plot gave us three general  
208 groups of stations for both seasons, which we interpreted as distinct microhabitat types  
209 (M1-3). We further statistically validated such microhabitats carrying out independent  
210 Discriminant Analyses for both seasons (DA, Addinsoft SARL's XLSTAT 2013;  $F =$   
211  $9.99$  dry;  $F = 9.64$ , rains; Wilk's Lambda = 0.0001 in both) (Fig. A.1). These analyses  
212 allow us to know what type of microhabitat corresponded to each sampling station.  
213 Thus, we constructed two different maps, assigning to each sampling station a color  
214 mark that represented the three different microhabitats for both seasons (M1: red, M2:  
215 green, M3: blue) (Fig. 2, Fig. A.1). To create typologies that describe at a fine scale the  
216 behavior of each one of the 23 variables within three microhabitats for both seasons, we  
217 built a plot whereas "Y" axis comprises of the 23 standardized variables and in the "X"  
218 axis corresponds to the three microhabitats constructed with the same 23 variables (Fig.  
219 A.1).

220 Due to not all 23 variables did not reveal a normal distribution, we applied two  
221 different tests to analyze the distribution changes on each microhabitat variable between  
222 the rainy and dry seasons. First, distribution normality was checked for every variable  
223 with Kolmogorov-Smirnov tests (Zar 1999). Thus, we used Student's t-parametric tests  
224 for variables normally distributed and non-parametric Wilcoxon test for non-normal

225 variables (Table 2). To know whether the number of stations structuring each type of  
226 microhabitat changed between seasons (seasonal microhabitat heterogeneity), we used a  
227 contingency table and  $\chi^2$  test. All these analyses were performed with XLSTAT 13  
228 (Addinsoft SARL). To examine the association between changes in spatial  
229 heterogeneity of microhabitats and dispersion patterns of *Peromyscus*, along with the  
230 entire grid, we conducted a Contingency Tables Analysis. Then, for visualizing  
231 associations between the *Peromyscus* and microhabitats, we performed a  
232 Correspondence Analysis with the constructed Contingency Tables for both seasons,  
233 including the abundance of each species in the three microhabitats (Table A.2).

234

### 235 *Spatial analysis*

236

237 To map variations in point density captures of small mammals, and to find density  
238 gradients across the plot area, we used the Kernel function (PAST, ver. 3.14, Hammer *et al.*  
239 *al.* 2001). To test the ecological dispersion patterns of both species within the plot (*i. e.*,  
240 clustering or overdispersion) for both seasons, we used a “Nearest Neighbor Analysis”  
241 (Clark and Evans, 1954) using the PAST software (ver. 3.14, Hammer *et al.* 2001). We  
242 applied the Wrap-around edge effect adjustment which is only appropriate for  
243 rectangular domains as our plot sampling (Hammer *et al.* 2001). In general, the  
244 “Nearest Neighbor Analysis” compares the mean distance of each main individual from  
245 its nearest neighbor of the same species with the mean distance expected for a set of  
246 points randomly dispersed at the same density (Vázquez and Álvarez-Castañeda 2011).  
247 The ratio of the observed mean distance to the expected distance ( $R$ ) indicates how the  
248 observed distribution deviates from random. Clustered points give  $R < 1$ , Poisson  
249 patterns give  $R \sim 1$ , while overdispersed points give  $R > 1$ .

250 To assess whether both species were associated or disassociated, we compared  
251 dispersion patterns between the two mice, using Ripley's K bivariate function (Ripley  
252 1977), since the method considers all distances among individuals located under a  
253 Cartesian scheme (X, Y) in a quadrat plot (Ripley 1976, Dale 1999, Zavala-Hurtado *et*  
254 *al.* 2000). We used PASSaGE (*ver.* 2, Rosenberg and Anderson 2011) to carry out  
255 Ripley's bivariate K analysis. We used the option to test the associations conditional on  
256 current locations hypothesis in PASSaGE. In this test, the point locations remain fixed,  
257 and only the types are randomized (the two *Peromyscus*). The number of each type  
258 remains fixed, but the association of each type with a specific, fixed location is  
259 randomized. In this case, one is not testing whether the points are themselves random or  
260 clustered, but rather whether the association of type A with type B (*P. difficilis* vs. *P.*  
261 *melanotis*) is what one would expect given the locations of the points as fixed  
262 (Rosenberg and Anderson 2011). We assigned coordinates to each sampling stations  
263 considering 5 m distance between them. Therefore, because each sampling station had a  
264 Cartesian coordinate system, we used as data input each station where we capture mice.  
265 Thereby, our null hypothesis involved independence between our two species *P.*  
266 *difficilis* and *P. melanotis* (Ripley 1976, Diggle 1983, Dale 1999), since we were  
267 interested in whether points of a specific type (*P. difficilis*) were associated, or  
268 disassociated, with points of the other specific type (*P. melanotis*). In other words,  
269 Ripley's  $K_{12}(d)$  allowed us to assess spatial attraction or repulsion between the two  
270 species, among the stations of the plot. To evaluate the statistical significance of  $K_{12}(d)$ ,  
271 we estimated 95% confidence envelopes (95% CI), using a Monte Carlo procedure,  
272 based on 1000 stochastic relocation simulations of the sampling stations in the plot  
273 (Upton and Fingleton 1985; Bailey and Gatrell 1995; Zavala-Hurtado *et al.* 2000).  
274 When  $L(d)$  was positive and took values over the upper limit of the confidence region,

275 we inferred dissociation or repulsion between the *Peromyscus* at the corresponding ( $d$ )  
276 scale; whereas a significant negative deviation indicated us a pattern of association or  
277 attraction between the two mice (Dale 1999). If  $L(d)$  remains within the limits of the  
278 95% CI for a given value of  $d$ , the null hypothesis of independence between the two  
279 contrasts cannot be rejected (Dale 1999). The height of the  $L(d)$  function (peak height)  
280 indicates the intensity of the association or repulsion. Control for edge effect was  
281 carried out for analysis by rescaling the counts based overlap with the study boundary  
282 setting the options area/volume which has been recommended for quadrats plots  
283 (Rosenberg and Anderson 2011).

284

285 *Prediction of microhabitat elements affecting the use of space by each species*

286

287 The next step was to assess which specific environmental variables best explained the  
288 frequency of both species within the plot at each season. For this, we performed  
289 Generalized Linear Models (GLMs), using JMP® (ver. 9, SAS Institute Inc., 1989-  
290 2007, Cary, NC.). First, we conducted a Principal Component Analysis (PCA) on the  
291 means of the 23 variables to obtain functions summarizing the most significant variance  
292 at each season. Because in both seasons the three first functions summarized a good  
293 portion of the variance (38.61 for the dry season and 45.92 for rains), we used these  
294 functions to construct the GLMs. Therefore, we assessed different models using the PCs  
295 as effect variables to explain the frequency of the individuals of both species for both  
296 seasons. Then, to visualize the fit of the model, the predicted values from the GLMs  
297 were plotting against the Principal Components of the best model chosen. For each  
298 species, the response variable in the models was the capture frequency at each trapping  
299 station of the grid, and we assumed a Poisson distribution with a log link function.

300

301

## Results

302 *Frequency of captures*

303

304 The total number of individuals captured from both species during the dry season was  
305 111, while for the rainy season was 168. For *P. difficilis* the total number of frequency  
306 capture in the dry season was 64. For *P. melanotis* during the dry season, we captured 47  
307 individuals. On the other hand, during the rainy season, the frequency of capture of *P.*  
308 *difficilis* was 87. While the total captures for *P. melanotis* were 81 (Table A.2).

309

310 *The Behavior of 23 variables of microhabitat between seasons*

311

312 When considering the mean value over all stations, 16 out of the 23 environmental  
313 variables showed a significant difference between the two seasons (Table 2, Fig. 3, Fig.  
314 A.1). The main changes were observed for variables related to herbaceous vegetation,  
315 according to plant coverage at different heights, and vegetation species richness (VR).  
316 As expected in overall, woody life forms were more stable between seasons (Table 2,  
317 Fig. 3, Fig. A.1). Components of microhabitat showing no statistical change between  
318 seasons were frequency of herbaceous plants at 10 cm (FH11), the frequency of both 35  
319 cm (FW23) and 50 cm (FW24) woody plants, as well as coverage of logs (CLO), rocks  
320 (RC), and bare soil (BS). Therefore, space configuration given by these structural  
321 features remained stable in both seasons (Fig. 3).

322

323

324

325 *Microhabitat heterogeneity*

326

327 The dendrogram from cluster analysis revealed three different classes of microhabitats  
328 (M1, M2, and M3) within the sampling plot in each season (Fig. A.1). M1 included  
329 more sampling stations during the dry season, while M2 covered the majority of  
330 sampling stations during the rainy season (Fig. 2, Fig. A.1, Table A.1). Indeed, Fisher's  
331 exact test of Contingency Tables Analysis revealed significant changes in the number of  
332 sampling stations ( $p = 0.004$ ) from dry to rains. The main changes occurred between  
333 M1 ( $\chi^2 = 2.123, p < 0.05$ ) and M2 ( $\chi^2 = 3.348, p < 0.05$ ), especially in the latter, since it  
334 augmented 24 sampling stations from the dry season to the rainy season (Fig. 2, Table  
335 A.1). Conversely, the number of sampling stations remained quite stable in M3 ( $\chi^2 =$   
336 0.011) throughout the study (Fig. 2, Fig. A.1, Table A.1).

337 Discriminant analyses validated heterogeneity of the three microhabitats (Fig. 2)  
338 within and between pluvial seasons. the percentage of variance associated to each  
339 discriminant function was clearer during the rainy season (dry season: F1 = 58.67 %, F2  
340 = 42.32 %; rainy season: F1 = 72.581 %, F2 = 27.419 %) (Fig. 2, Fig. A.1).

341 Discriminant functions explained variation due to woody plants in the understory in the  
342 dry season, while herbaceous vegetation together with decayed matter and logs became  
343 more relevant at rains (Table A.3). Wilk's Lambda showed that at least the mean of one  
344 microhabitat differed statistically from the others either in the dry and rainy season ( $p =$   
345 0.0001;  $p = 0.0001$ , respectively) (Fig. A.1). These results corroborated spatial and  
346 temporal heterogeneity drawn from cluster analysis of individual station features in the  
347 grid plot. During the dry season, 93.33 % of individual sampling stations remained  
348 correctly classified, and 94.17 % of them during the rainy season (Fig. 2).

349

350 *Description of microhabitats within the plot*

351

352 *Microhabitat 1.* M1 (Fig. 2, Fig. A.1) was characterized by low amounts, or absence, of  
353 vegetation cover at different heights (VC) and by a low frequency of herbaceous and  
354 woody plants (FH and FW, respectively). In contrast, organic matter on the ground  
355 (OM) was the most frequent component. This microhabitat was also distinctive for  
356 having extensive coverage of logs (CLO) on the ground and for being the microhabitat  
357 with the significant presence of burrows (BW).

358 *Microhabitat 2.* M2 (Fig. 2, Fig. A.1) was the largest area covered by herbaceous life  
359 forms at different heights; vegetation species richness (VR) and the total number of  
360 herbaceous plants (TH) also remained very high. Woody life forms at 25 cm (FW22)  
361 were present but at low frequencies, while FW24 and FW25 remained at higher  
362 frequencies. Coverage on the ground of small logs or dead wood (CLO), of rocks (RC),  
363 and organic matter (OM) were shallow during the study. Bare soil surface (BS)  
364 increased to higher amounts during the dry season, while it decreased during the rainy  
365 season. There were no burrows (BW) in this microhabitat.

366 *Microhabitat 3.* In M3 (Fig. 2, Fig. A.1), VC25, VC35, VC50, and VC100 showed high  
367 values, while vegetation species richness (VR) averaged the highest compared to other  
368 microhabitats. The total number of woody plants (TW) and frequency of woody plants  
369 at different heights (FW21-25) remained very high, while the total number of  
370 herbaceous plants (TH) was low. Vegetation coverage at 10 cm (VC10), rocks (RC),  
371 logs (CLO), and bare soil surface (BS) were low during the dry season; however, VC10  
372 increased in the rainy season. Conversely, OM was present in the dry season but  
373 decreased in the rainy season. The number of burrows (BW) remained quite scarce.

374

375 *Association between the microhabitats and species*

376

377 Kernel Graphs (Fig. 4) indicated that the two species used space distinctive since they  
378 were differentially scattered along the plot. *Peromyscus difficilis* was more abundant  
379 during the dry season, occupying a large portion of the plot. Instead, *P. melanotis*  
380 increased its distribution during the rains when it seemed to displace *P. difficilis* into  
381 other sampling stations (Fig. 4). Distribution rearrangements between seasons implied  
382 that one species occupied some stations more frequently than the other, and vice versa  
383 (Fig. 4). Indeed, the two  $\chi^2$  tests yielded statistical abundance differences in each species  
384 at both microhabitats and seasons (Table A.2: dry season;  $R^2$  (U) = 0.09,  $n = 111$ ,  $df = 2$ ,  
385 Likelihood Ratio  $\chi^2 = 15.07$ ,  $p = 0.00005$ ; rainy season;  $R^2$  (U) = 0.02,  $n = 168$ ,  $df = 2$ ,  
386 Likelihood Ratio  $\chi^2 = 6.40$ ,  $p = 0.0406$ ).

387         During the dry season (Fig. 5 and Table A.2), *Peromyscus difficilis* was highly  
388 related to M2 (80 % captured mice) and also related to M1 (64 % captured mice);  
389 conversely, *P. melanotis* was captured more frequently in M3 (66 % captured mice).  
390 Spatial use of microhabitats changed for both species in the rains (Fig. 5 and Table  
391 A.2), showing a microhabitat partition again, though less visible: in the Correspondence  
392 Analysis, 61 % of mice caught in M1 were *P. difficilis*. This species was also related to  
393 M3, while 60% of mice caught of *P. melanotis* were captured in M2.

394

395 *Spatial Patterns*

396

397 The Nearest Neighbor Analysis revealed that in both seasons both species showed a  
398 significant clustered pattern within the plot (Table 3). In the dry season, the mean  
399 distance between individuals of *P. difficilis* displayed to be more clustered than the



400 individuals of *P. melanotis*. However, the mean distance between individuals of *P.*  
401 *difficilis* increases in the rainy season, while individuals of *P. melanotis* showed a  
402 reduction in their area occupied (Table 3).

403 On the other hand, during the dry season, Ripley's bivariate K showed a  
404 statistically significant pattern of repulsion for both *Peromyscus* in almost all analyzed  
405 distances of the entire plot, excused at 2 m where it shows an attraction pattern (Fig.  
406 6a). Such repulsion pattern turned over in almost all distances during the rainy season  
407 (Fig. 6b), since the two species became more associated, sharing microhabitats in  
408 almost all capture stations. However, during the rainy season, significant statistical  
409 peaks of repulsion reappeared between the species at distances of five, ten, and 14 m  
410 (Fig. 6b). Analyses also revealed the intensity of these patterns; *e.g.*, the likelihood for  
411 finding individuals of *P. difficilis* and *P. melanotis* together at the same capture station  
412 was very low during the dry season (Fig. 6a), while this probability increased in the  
413 rainy season (Fig. 6b).

414

415 *Structural components of microhabitats affecting the distribution of small mammals*

416

417 Criteria for the selecting models that most explained the frequency of mice for each  
418 species at each season in the sampling stations included: model significance of  $p <$   
419 0.05; lowest Akaike Information Criterion (AIC), *i. e.*, a measure of goodness-of-fit  
420 penalized by the number of variables (Posada and Buckley 2004); Pearson goodness-of-  
421 fit ( $p < 0.05$ ) and its deviation (Deviance;  $p < 0.05$ ); as well as the biological and  
422 ecological meaning of results. Therefore, during the dry season, PC1 and PC3 predicted  
423 the frequency of *P. difficilis* according to the best Generalized Linear Model for this  
424 season (AICc 212.55) (Table 5, Fig. 5c). Environmental variables with higher scores in

425 the PC1 ( $p = 0.0186$ ) were the total number of herbaceous plants (TH), vegetation  
426 species richness (VR), and vegetation cover at 10 cm (VC10). In PC3 ( $p = 0.0001$ ),  
427 characterizing variables were the number of logs on the ground (CLO), as well as the  
428 presence of burrows (BW) (Table 4, 5, Fig. 5c). These five variables were also the main  
429 elements characterizing M2 (PC1) and M1 (PC3), the two habitats where the frequency  
430 of capture of *P. difficilis* was the higher. As for *P. melanotis* (Fig. 5c), the frequency of  
431 capture of *P. melanotis* was positively related to PC2 (AICc = 204.47,  $p = 0.0001$ ).  
432 Here, among the four variables with higher scores, were the total number of woody  
433 vegetation (TW) and frequency of woody life forms characterizing 10 cm height  
434 (FW21), the two main elements at M3 for the dry season (Table 4, 5, Fig. 5c).

435         During the rainy season, a similar pattern of microhabitat partition occurred  
436 between the two species. The best GLM model for *P. difficilis* in this season (Table 4, 5,  
437 Fig. 5c) was mainly associated with the total number of woody plants (TW),  
438 herbaceous forms at 50 cm (FH14), woody forms at 10 and 100 cm (FW21, FW25,  
439 respectively) and with the number of logs on the ground (CLO), in PC2; and with the  
440 number of logs on the ground (CLO), and organic matter (OM) in PC3 (AICc = 286.76,  
441  $p = 0.0001$ ) (Table 4, 5). The latterly involved variables with a high presence at M1  
442 (PC3) and M3 (PC2) during the wet season, where *P. difficilis* was more frequently  
443 captured. On the other hand, *P. melanotis* (Fig. 5c) was only associated with PC1 (AICc  
444 = 241.01,  $p = 0.0343$ ). The primary variables characterizing this component were the  
445 number of total herbaceous plants (TH), vegetation species richness (VR), and the plant  
446 cover at almost all analyzed heights (VC10-100 cm) (Table 4).

447

448

449

450

## Discussion

451

452 Our results of Contingency Tables Analysis, Correspondence Analysis, and GLMs  
453 models showed that the two syntopic species of *Peromyscus* switched and split  
454 resources in space, as environmental conditions changed. Also, our findings on  
455 microhabitat relations of rodents in a patch of a mid-latitude temperate forest, concur  
456 with the habitat heterogeneity coexistence hypothesis (Cramer and Willig 2002;  
457 Valladares *et al.* 2015). We found that both *Peromyscus* were sensitive to slight changes  
458 in microhabitat structure and that the three microhabitats provided different resources  
459 for each one. Our results also suggest that coexistence between these syntopic  
460 *Peromyscus* is facilitated by temporal differences in space structure, and probably also  
461 by changes on the availability of both food and shelter that go with it (Pianka 1973;  
462 Schoener 1974). For instance, *P. difficilis* was more related to M1 and M2 by the dry  
463 season, while *P. melanotis* was highly related to M3. Conversely, *P. difficilis* was more  
464 related to M1 and frequently captured to M3 by the rainy season, while *P. melanotis*  
465 was highly related to M2. Partition in space use has already been documented for  
466 coexisting species of *Peromyscus* within a community; *i.e.*, extensive studies of niche  
467 partitioning by *Peromyscus leucopus* and *P. maniculatus* (Kaufman and Kaufman  
468 1989). Moreover, several studies have demonstrated variation in spatial resource use by  
469 congeneric species (Barry *et al.* 1990; Dooley and Dueser 1996; Kalcounis-Rüppell and  
470 Millar 2002).

471 In our study, *P. difficilis* remained related to M1 in both seasons, especially to  
472 the former during the wet season. The number of fallen logs was very high at M1. Such  
473 microhabitat represents small patches of food for small mammals, offering invertebrates  
474 (Bellows *et al.* 2001), refuges and shelters (Bowman *et al.* 2001). In this microhabitat,

475 individuals of *P. difficilis* can also use the long and big fallen logs as pathways for quick  
476 and straight locomotion inside the forest (Bellows *et al.* 2001; Dewalt *et al.* 2003).  
477 Indeed, fallen logs promote structural complexity of forests and may enhance positive  
478 interaction among species of small mammals (Bowman and Facelli 2013). GLM's  
479 analyses showed that PC1 and PC3 explained the abundance of *P. difficilis* during the  
480 dry season and by PC2 and PC3 in the rainy season. In the dry season, variables  
481 contributing most to PCA ordination in PC1 and PC3 were the total number of  
482 herbaceous vegetation (TH), vegetation species richness (VR), vegetation coverage at  
483 10 cm (VC10), herbaceous forms at 10 cm (FH11) and the number of logs on the  
484 ground (CLO), as well as burrows (BW). While in the dry season, PC2 and PC3  
485 represented woody vegetation (TW), the number of logs on the ground, herbaceous  
486 forms at 50 cm (FH14), woody forms at 25 and 100 cm (FW21 and FW25, respectively)  
487 and organic matter (OM). Bellows *et al.* (2001) found a similar result in a high latitude  
488 temperate forest (Virginia, USA), where distribution of a small mammal, generalist  
489 species was associated with the diameter of fallen logs, the frequency of shrubs, and  
490 degree of canopy closure. Association between rodents and fallen logs was also  
491 documented for *Nectomys squamipes* that builds up its nests inside decomposed, fallen  
492 logs (Briani *et al.* 2004); this has also been recorded for other rodent species in several  
493 biomes with different vegetation types (*e. g.*, *Rattus rattus*, *Nesomys audeberti* in  
494 Lehtonen *et al.* 2001; *Oligoryzomys nigripes* in Dalmagro and Vieira 2005). In contrast,  
495 *P. melanotis* showed a close relation with only one PC over each pluvial season. During  
496 the dry season, the frequency of this species was only related to PC2, which represented  
497 the total number of woody vegetation (TW) and FW21. Then by the rainy season, the  
498 species became only related to PC1, which accounted for understory dominated by  
499 herbaceous life forms (TH). Relationships between frequency of rodents and habitats

500 with increased understory density have been interpreted as a protection against aerial  
501 predators (Dalmagro and Vieira 2005) or as a preference for more complex habitats that  
502 enable for vertical stratifications and, thus for extended coexistence inside fragments  
503 (Grelle 2003; Johnson 2007).

504 Intrinsic factors as sex and mating system must also be related to the coexistence  
505 of both *Peromyscus*. For instance, the Nearest Neighbor Analysis revealed that in both  
506 seasons both species showed a significant clustered pattern within the plot. However,  
507 the mean distance between individuals of *P. difficilis* displayed to be more clustered  
508 than the individuals of *P. melanotis*, especially during the dry season. Indeed, the mean  
509 distance between individuals of *P. difficilis* increases in the rainy season, while  
510 individuals of *P. melanotis* showed a reduction in their area occupied. These patterns  
511 are related with the breeding season of both species. Our data (not published) revealed  
512 that during the dry and rainy seasons were captured individuals of *P. difficilis* with signs  
513 of reproductive activity, especially during the dry season (males: inguinal vs. scrotal  
514 testicles, females: alopecia, the presence of milk, the appearance of the vagina,  
515 gestation). While for *P. melanotis* the primary breeding season occurs during the rains.  
516 Individuals need different resources requirements to fulfill the breeding season and this  
517 impact on its dispersion and coexistence. We believe that *P. melanotis* may be moving  
518 to other areas with more beneficial conditions (*i. e.* more availability of resources).  
519 Thus, the coexistence between both *Peromyscus* may occur because the geographic  
520 segregation of *P. melanotis* to search for better environmental conditions to survive.  
521 Indeed, in this study, we define to *P. melanotis* as an opportunistic species throughout  
522 the study area because the capture frequencies of the individuals only increased (as we  
523 pointed out early) when the environmental conditions became more beneficial for the  
524 survival of these. That is, throughout the time of capture except for the rainy season, its

525 frequency of capture remained at low levels compared to those of *P. difficilis* (resident  
526 species), increasing drastically in the rainy season when there is greater accessibility for  
527 the use of resources and competition between the two species decreases. Therefore, *P.*  
528 *melanotis* may be coming back to the area during the rainy season to carry out the  
529 breeding season. However, Chupp (2002) showed an opportunistic habitat use by small-  
530 sized *Peromyscus leucopus*, which he related to predation risk. Further studies about the  
531 geographic segregation and the influence of predation on the opportunistic behavior of  
532 *P. melanotis* are needed. Also, the increase in the number of captures of both species  
533 from the dry to the rains could be leaded for the breeding season and resources  
534 availability. One possible consequence of such intrinsic and extrinsic operating factors  
535 is that *P. difficilis* remained more abundant and always present at the microhabitats with  
536 more stable elements in the study area (our unpublished data), while *P. melanotis* only  
537 increased its abundance during the rainy season, when environmental conditions  
538 became more benign, and plant cover became denser. Since rains promote an increase  
539 of primary productivity, allowing more resource availability (mainly food) and  
540 enhancing microhabitat carrying capacity, such habitat changes facilitate coexistence  
541 between both *Peromyscus*, and with other small land mammals in the area (Castro-  
542 Campillo *et al.* 2008, 2012). Ripley's bivariate K supported and shed light into such  
543 outcome since the species showed repulsion between them in almost all analyzed  
544 distances during the dry season; *i.e.*, due to resources availability are more scarce during  
545 this season, is not so common that a mixed pair of mice used the same microhabitat.  
546 Moreover, as in this season is the primary breeding season of *P. difficilis* is probably  
547 that territoriality behavior can occur. Conversely, the intensity of such repulsion  
548 decreased substantially during the rainy season; indeed, at some analyzed distances, the  
549 two deer mice showed an association pattern. Holding our results that the increase of

550 resources available during the rainy season can allow that the species can share the  
551 habitat. Thus, our results indicate that in these two syntopic *Peromyscus*, both  
552 microhabitat use and spatial organization are seasonally variable (Brown and Zeng  
553 1989; Cramer and Willig 2002). It is important to point out that during both seasons  
554 Ripley's bivariate K indicated an interesting attraction pattern between 2 and 3 m. This  
555 patterns could be due to sampling design. Ergo we set only one Sherman trap in each  
556 sampling station for two days, therefore if one individual of *P. difficilis* was captured in  
557 the first day and then one individual of *P. melanotis* was captured in the same station  
558 where we captured the *P. difficilis*, the analysis counts this pattern as an association  
559 because they were trapped in the same station at a very short distance.

560         Also, the partition of space by this syntopic deer mice must be facilitated by  
561 their respective locomotive habits as semiarboreal (*P. difficilis*) and cursorial (*P.*  
562 *melanotis*). The long tail of *P. difficilis* must enable it to rush and climb along shrubs or  
563 trees (Álvarez-Castañeda 2005), thus easing its preference for habitats where it can  
564 escape from predators. In fact, adult color coat changed in *P. difficilis* between pluvial  
565 seasons, becoming more similar to ground litter; *e. g.*, in this resident deer mouse, color  
566 phenotype plasticity must be a cryptic response elicited against predators. On the other  
567 hand, a smaller sized body, together with a shorter tail and narrower soles (Fernandez *et*  
568 *al.* 2010), should enable the cursorial *P. melanotis* to occupy such zones as M2 and M3,  
569 where predators cannot easily spot it through a dense vegetation cover, so it can scape  
570 very quickly. Indeed, high shrubs cover provide both protection from predators and  
571 food sources, since seeds may be concentrated under shrub canopies (Thompson 1982;  
572 Mohammadi 2010). In fact, rodents usually avoid foraging in unsheltered microhabitats  
573 and forest edges where they are more likely to be spotted by avian (Kotler *et al.* 1991)  
574 and other vertebrate predators (Morris and Davidson 2000; Mohammadi 2010).

575           Finally, we want to highlight and recommend our sampling of environmental  
576 features and quantitative analyses, especially for Ripley's bivariate K, as neither one has  
577 been extensively used in studies focusing on the spatial dynamics of dispersion in small  
578 rodents, despite its important advantages. The methodological approach used here,  
579 together with the gathered evidence became relevant for providing us with necessary  
580 information about the ability of this two *Peromyscus* to split resources in a mid-latitude  
581 temperate forest at the edge of a megalopolis, which continuous growth produces  
582 fragmentation and patching of natural microhabitats. Therefore, our local scope was  
583 explicitly designed at this initial point, to focus on small-sized rodents with low vagility.  
584 Besides, we successfully aimed to reconstruct vegetation structure, to provide us with  
585 clues as to how to eventually manage such perturbed ecosystems for conservation  
586 purposes. We also think that our methodology can be helpful in other scenarios for  
587 understanding small rodents, such as ethological dynamics, activity patterns, and  
588 reproductive systems at either or both intra or interpopulation levels.

589

590

### Acknowledgments

591

592 We thank Juan Luis Patiño Ortega and Claudia Peralta Juarez for their fieldwork  
593 assistance and friendly logistic support. The staff at UAMI mammal scientific collection  
594 kindly provided all the facilities for specimen curation and housing. Authorities in  
595 charge of DLNP (CORENA, SEMARNAT), as well as the forest rangers and  
596 administration staff at the National Park, buoyed us with information, security, and  
597 logistics to complete our studies. This paper contains partial information from the thesis  
598 of Master in Biology (DCBS, UAM-I) of IMDA; IMDA received financial support  
599 through a fellowship (283799, CVU 479479) from the National Council of Science and



600 Technology (CONACyT). This study was supported by annual grants (143.\*\*\*.46 IB-  
601 DCBS-UAMI, 2013-2017) to AACC.

602

603

### References

- 604 Álvarez-Castañeda, S.T. (2005). *Peromyscus melanotis*. Mamm. Spec. 764, 1-4.
- 605 Barry Jr, R.E., Heft, A.A., Baummer, TE. (1990). Spatial relationships of syntopic white-  
606 footed mice, *Peromyscus leucopus*, deer mice, *Peromyscus maniculatus*, and red-  
607 backed voles, *Clethrionomys gapperi*. Can Field-Nat. 104, 87-393.
- 608 Bellows, A.S., Pagels, J.F., Mitchell, J.C. (2001). Macrohabitat and microhabitat  
609 affinities of small mammals in a fragmented landscape on the upper coastal plain of  
610 Virginia. Amer. Midl. Nat. 146(2), 345-360.
- 611 Briani, D.C., Palma, A.R., Vieira, E.M., Henriques, R.P. (2004). Post-fire succession of  
612 small mammals in the Cerrado of central Brazil. Biodivers. Conserv. 13(5), 1023-  
613 1037.
- 614 Brown J.H, Zeng, Z. (1989). Comparative population ecology of eleven species of rodents  
615 in the Chihuahuan Desert. Ecol. 70(5), 1507-1525.
- 616 Bowers, M.A. (1982). Foraging behavior of heteromyid rodents: field evidence of  
617 resource partitioning. J. Mamm. 63(3), 361-367.
- 618 Bowers, J.H., Baker, R.J., Smith, M.H. (1973). Chromosomal, electrophoretic, and  
619 breeding studies of selected populations of deer mice (*Peromyscus maniculatus*) and  
620 Black-eared mice (*P. melanotis*). Evol. 27(3), 378-386.
- 621 Bowman, J., Forbes, G., Dilworth, T. (2001). Landscape context and small-mammal  
622 abundance in a managed forest. For. Ecol. Manag. 140(2), 249-255.
- 623 Bowman, A.S., Facelli, J.M. (2013). Fallen logs as sources of patchiness in chenopod  
624 shrublands of South Australia. J. Arid Environ. 97, 66-72.
- 625 Bowne, D.R., Peles, J.D., Barrett, GW. (1999). Effects of landscape spatial structure on  
626 movement patterns of the hispid cotton rat (*Sigmodon hispidus*). Landsc. Ecol. 14(1),  
627 53-65.
- 628 Canfield, R.H. (1941). Application of the line interception method in sampling range  
629 vegetation. J. For. 39(4), 388-394.
- 630 Carey, A.B., Harrington, C.A. (2001). Small mammals in young forests: implications for  
631 management for sustainability. For. Ecol. Manag. 154(1), 289-309.
- 632 Carleton, M.D. (1989). Systematic and evolution. Pp. 7-141 in Advances in the study of  
633 *Peromyscus* (Rodentia) (G. L. Kirkland, Jr., and J. N. Layne, eds.). Texas Tech  
634 University, Lubbock.
- 635 Castro-Campillo, A., León-Altamirano, L., Herrera-Muñoz, J., Salgado-Ugarte, I.,  
636 Mendieta Márquez, E., Contreras-Montiel, JL., Serrano, H., Ramírez-Pulido, J.,  
637 Salame-Méndez, A. (2012). Is there a difference between T contents in two  
638 populations of the Black-eared Mouse, living under similar conditions but with  
639 differences in two population patterns? Acta Zool. Mex. (n. s.) 28(3), 525-539.
- 640 Castro-Campillo, A., Salame-Méndez, A., Vergara-Huerta, A., Castillo, A., Ramírez-  
641 Pulido, J. (2008). Fluctuaciones de micromamíferos terrestres en bosques templados  
642 aledaños a la ciudad de México. Distrito Federal. Pp. 391-410 in Avances en el  
643 Estudio de los Mamíferos de México (Lorenzo, C, Espinoza E, Ortega J, eds.).

- 644 Publicaciones especiales. Vol. II, Asociación Mexicana de Mastozoología, A. C.,  
645 México, D. F. 726 pp.
- 646 Cramer, M.J., Willig, M.R. (2002). Habitat heterogeneity, habitat associations, and rodent  
647 species diversity in a sand-shinnery-oak landscape. *J. Mamm.* 83(3), 743-753.
- 648 Coppeto, S.A., Kelt, D.A., Van Vuren, D.H., Wilson, J.A., Bigelow, S. (2006). Habitat  
649 associations of small mammals at two spatial scales in the northern Sierra Nevada. *J.*  
650 *Mamm.* 87, 402-413.
- 651 Currie, D.J. (1991). Energy and large-scale patterns of animal and plant species richness.  
652 *American Naturalist* 137: 27-49.
- 653 Chesson, P. (2000). Mechanisms of maintenance of species diversity. *Annu. Rev. Ecol.*  
654 *Syst.* 31, 343-366. doi: 10.1146/annurev.ecolsys.31.1.343
- 655 Chupp, AD. (2002). Habitat selection in four sympatric small mammal species and the  
656 effects of potential predators on *Peromyscus leucopus*. Master of Science Thesis.  
657 Department of Biology, Ohio University, 61 pp.
- 658 Dale, MRT. (1999). Spatial pattern analysis in plant ecology. Cambridge University  
659 Press.
- 660 Dalmagro, A.D., Vieira, E.M. 2005. Patterns of habitat utilization of small rodents in an  
661 area of Araucaria forest in Southern Brazil. *Austral Ecol.* 30, 353-362.
- 662 De la Cruz-Argüello, I.M. (2015). Patrones de microdistribución en los mamíferos  
663 pequeños en vegetación secundaria en el Parque Nacional Desierto de los Leones.  
664 Tesis de Maestría en Ciencias. División de Ciencias Biológicas y de la Salud,  
665 Universidad Autónoma Metropolitana, Unidad Iztapalapa, pp. 256.
- 666 DeWalt, S.J., Maliakal, S.K., Denslow, J.S. (2003). Changes in vegetation structure and  
667 composition along a tropical forest chronosequence: implications for wildlife. *For.*  
668 *Ecol. Manag.* 182(1), 139-151.
- 669 Dooley, J.L., Dueser, R.D. (1996). Experimental tests of nest site competition in two  
670 *Peromyscus* species. *Oecologia* 105, 81-86
- 671 Dooley, J.L., Bowers, M.A. (1998). Demographic responses to habitat fragmentation:  
672 experimental tests at the landscape and patch scale. *Ecol.* 79(3), 969-980.
- 673 Fahrig, L., Merriam, G. (1994). Conservation of fragmented populations. *Conserv. Biol.*  
674 8(1), 50-59.
- 675 Fernández, J.A., García-Campusano, F., Hafner, M.S. (2010). *Peromyscus difficilis*  
676 (Rodentia: Cricetidae). *Mamm. Spec.* 42(1), 220-229.
- 677 Forsman, E.D., Meslow, E.C., Wight, H.M. (1984). Distribution and biology of the  
678 spotted owl in Oregon, USA. *Wildl. Monographs.* 87, 1-64.
- 679 Galindo, C., Krebs, C.J. (1985). Habitat use and abundance of Deer Mice: interactions  
680 with Meadow Voles and Red-backed Voles. *Can. J. Zool.* 63, 1870-1879.
- 681 Gunther, P.M., Horn, B.S., Babb, G.D. (1983). Small mammal populations and food  
682 selection in relation to timber harvest practices in the western Cascade Mountains.  
683 *Northwest Sci.* 57, 32-44.
- 684 Grelle, C.E.V. (2003). Forest structure and vertical stratification of small mammals in a  
685 secondary Atlantic forest, southeastern Brazil. *Stud. Neotrop. Fauna Environ.* 38(2),  
686 81-85.
- 687 Haim, A., Rozenfeld, F.M. (1993). Temporal segregation in coexisting *Acomys* species:  
688 the role of odour. *Physiol. Behav.* 54(6), 1159-1161.
- 689 Hammer, Ø., Harper, D.A.T., Ryan, P.D. (2001). PAST: PAleontological STatistics  
690 software package for education and data analysis. *Palaeontol. Electronica* 4, 1-9.
- 691 Johnson, M.L., Gaines, M.S. (1990). Evolution of dispersal: theoretical models and  
692 empirical tests using birds and mammals. *Annu. Rev. Ecol. Syst.* 21(1), 449-480.

- 693 Johnson, M.D. (2007). Measuring habitat quality: a review. *Condor* 109(3), 89-504.
- 694 Jorgensen, E.E. (2004). Small mammals use of microhabitat reviewed. *J. Mamm.* 85(3),  
695 531-539.
- 696 Kalcounis-Rüppell, M.C., Millar, J.S. (2002). Partitioning of space, food, and time by  
697 syntopic *Peromyscus boylii* and *P. californicus*. *J. Mamm.* 83, 614-625.
- 698 Kaufman, D.W., Kaufman, G.A. (1989). Population biology. pp. 233-271 in *Advances in*  
699 *the study of Peromyscus* (Rodentia) (G. Kirkland, JR. and J. Layne, eds.). Texas Tech  
700 University Press, Lubbock.
- 701 Kotler, B.P., Ayal, Y., Subach, A. (1994). Effects of predatory risk and resource renewal  
702 on the timing of foraging activity in a gerbil community. *Oecologia* 100(4), 391-396.
- 703 Kotler, B.P., Brown, J.S., Hasson, O. 1991. Factors affecting gerbil foraging behavior  
704 and rates of owl predation. *Ecol.* 72, 2249-2260.
- 705 Lehtonen, J.T., Mustonen, O., Ramiarinjanahary, H., Niemelä, J., Rita, H. (2001). Habitat  
706 use by endemic and introduced rodents along a gradient of forest disturbance in  
707 Madagascar. *Biodivers. Conserv.* 10, 1185-1202.
- 708 Maser, C., Maser, Z. (1988). Interactions among squirrels, mycorrhizal fungi, and  
709 coniferous forests in Oregon. *Great Basin Nat.* 48, 358-369.
- 710 M'Closkey, R.T., Fieldwick, B. (1975). Ecological separation of sympatric rodents  
711 (*Peromyscus* and *Microtus*). *J. Mamm.* 56(1), 119-129.
- 712 M'Closkey, R.T., Lajoie, D.T. (1975). Determinants of local distribution and abundance  
713 in White-Footed Mice. *Ecol.* 56(2), 467-472.
- 714 Mohammadi, S. (2010). Microhabitat selection by small mammals. *Adv. Biol. Res.* 4(5),  
715 283-287.
- 716 Monamy, V., Fox, B.J. (1999). Habitat selection by female swamp rats (*Rattus lutreolus*)  
717 drives asymmetric competition and coexistence with long-tailed mice (*Pseudomys*  
718 *higginsii*). *J. Mamm.* 80, 232-242.
- 719 Morris, D.W. (1987). Ecological scale and habitat use. *Ecol.* 68(2), 362-369.
- 720 Morris, D.W. (1984a). Sexual differences in habitat use by small mammals: evolutionary  
721 strategy or reproductive constraint? *Oecologia* 65(1), 51-57.
- 722 Morris, D.W. (1984b). Patterns and scale of habitat use in two temperate-zone, small  
723 mammal faunas. *Can. J. Zool.* 62(8), 1540-1547.
- 724 Pianka, E.R. (1973). The structure of lizard communities. *Annu. Rev. Ecol. Syst.* 4(1),  
725 53-74.
- 726 Pyare, S., Longland, W.S. (2001). Patterns of ectomycorrhizal fungi consumption by  
727 small mammals in remnant old-growth forests of the Sierra Nevada. *J. Mamm.* 82,  
728 681-689.
- 729 Posada, D. and Buckley, T.R. (2004). Model selection and model averaging in  
730 phylogenetics: advantages of Akaike Information Criterion and Bayesian  
731 Approaches Over Likelihood Ratio Tests, *Systematic Biology* 53(5), 793-808,
- 732 Ramírez-Pulido, J., Lira, I., Gaona, S., Müdespacher, C., Castro-Campillo, A. (1989).  
733 Manejo y mantenimiento de colecciones mastozoológicas. Universidad Autónoma  
734 Metropolitana, Unidad Iztapalapa, México, D.F.
- 735 Ripley, B.D. (1976). The second-order analysis of stationary point processes. *J. Appl.*  
736 *Probab.* 13(2), 255-266.
- 737 Rosenberg, M.S., Anderson, C.D. (2011). PASSaGE: pattern analysis, spatial statistics,  
738 and geographic exegesis. Version 2. *Methods Ecol. Evol.* 2(3), 229-232.
- 739 Schoener, T.W. (1974). Resource partitioning in ecological communities. *Science*  
740 185(4145), 27-39.

- 741 Schreiber, S. and Killingback P.T. (2013). Spatial heterogeneity promotes coexistence of  
742 rock-paper-scissor metacommunities. Theoretical population biology. 86.  
743 10.1016/j.tpb.2013.02.004.
- 744 Seagle, S.W. (1985). Patterns of small mammal microhabitat utilization in cedar glade  
745 and deciduous forest habitats. J. Mamm. 66(1), 22-35.
- 746 Schreiber, S. J., and Killingback, T. P. 2013. Spatial heterogeneity promotes coexistence  
747 of rock-paper-scissors metacommunities. Theor. Popul. Biol. 86, 1–11. doi:  
748 10.1016/j.tpb.2013.02.004
- 749 Smartt, R.A. (1978). A comparison of ecological and morphological overlap in a  
750 *Peromyscus* community. Ecol., 59:21.
- 751 Thompson, S.D. (1982). Structure and species composition of desert heteromyid rodent  
752 species assemblages: effects of a simple habitat manipulation. Ecol. 63(5),1313-  
753 1321.
- 754 Valladares, F., Bastias, C.C., Godoy, O., Granda, E., Escudero, A. (2015). Species  
755 coexistence in a changing world. Front. Plant Sci. 6, art. 866.
- 756 Vander Wall, S.B., Thayer, T.C., Hogbe, S.B., Beck, M.J., Roth, J.K. (2001). Scatter-  
757 hoarding behavior of deer mice (*Peromyscus maniculatus*). West. N. Am. Nat. 61,  
758 109-113.
- 759 Villanueva-Hernández, A.I., Delgado-Zamora, D.A., Heynes-Silerio, S.A., Ruacho-  
760 González, L., López-González, C. (2017). Habitat selection by rodents at the  
761 transition between the Sierra Madre Occidental and the Mexican Plateau, México. J.  
762 Mamm. 98(1), 293-301.
- 763 Ward, J.H. (1963). Hierarchical grouping to optimize an objective function. J. Am. Stat.  
764 Assoc. 58(301), 236-244.
- 765 Wiens, J.A. (2000). Ecological heterogeneity: an ontogeny of concepts and approaches.  
766 *In: The Ecological Consequences of Environmental Heterogeneity* (Stewart AJA,  
767 John EA, Hutchings MJ, eds). Blackwell, Oxford, Pp. 9-31.
- 768 Zar, JH. (1999). Biostatistical Analysis. Prentice Hall, Princeton.
- 769 Zavala-Hurtado, JA., Valverde, PL., Herrera-Fuentes, MC., Díaz-Solis, A. (2000).  
770 Influence of leaf-cutting ants (*Atta mexicana*) on performance and dispersion  
771 patterns of perennial desert shrubs in an inter-tropical region of Central Mexico. J.  
772 Arid Environ. 46, 93-102.
- 773 Zavaleta, E. S., Shaw, M. R., Chiariello, N. R., Mooney, H. A., and Field, C. B. (2003).  
774 Additive effects of simulated climate changes, elevated CO<sub>2</sub>, and nitrogen deposition  
775 on grassland diversity. Proc. Nat. Acad. Sci. 100, 7650–7654. doi:  
776 10.1073/pnas.0932734100
- 777 Zielinski, W.J., Spencer, W.D., Barrett, R.H. (1983). Relationship between food habits  
778 and activity patterns of Pine Martens. J. Mamm. 64, 387-396.
- 779  
780  
781  
782  
783  
784  
785  
786  
787  
788  
789

790

## Figure legends

791

792 **Fig. 1.** Sampling plot design. a) Total plot area was 2475 m<sup>2</sup>; each intersection (n = 120)  
793 was an independent sampling station for capturing mice. An influence area of 2.5 m<sup>2</sup>  
794 around each station was constructed for sampling 24 microhabitat environmental  
795 variables. b) Close up to the influence area showing the eight transects used for drawing  
796 environmental variables; note subdivisions into three subtransects.

797 **Fig. 2.** Map of the distribution of the microhabitats (M1 = red, M2 = green, M3 = blue)  
798 in the study quadrant for dry (A) and rainfall (B). The bar graph below shows the change  
799 in the number of sampling stations between dry and rainy seasons. \*\*  $p = 0.001$

800 **Fig. 3.** Box-plots are showing the seasonal heterogeneity of the 23 variables sampled in  
801 the study plot between dry and rainy seasons. Overall, vegetation variables show an  
802 increase in the rainy season, while the organic matter (OM) decrease. Structural elements  
803 as logs on the ground do not show differentiation between seasons. Some variables were  
804 not present in high quantities along the study plot. Therefore we were unable to build the  
805 box-plot. The red cross represents the mean of each variable.

806 **Fig. 4.** Spatial analysis with Kernel density points showing capture frequencies for *P.*  
807 *difficilis* at dry (a) and rainy (b) seasons, and for *P. melanotis* at dry (c) and rainy (d).  
808 Dots depict actual capture points, while hot spots color indicates higher density.

809 **Fig. 5.** Correspondence analysis from contingency tables of frequency capture data for  
810 each deer mouse (*P. difficilis* and *P. melanotis*) in each microhabitat (M1-3), during the  
811 dry (a) and rainy (b) seasons, respectively. Axis c1 and c2 indicate the coordinates  
812 resulted from the ordination of each variable from the analysis. Figure c shows the plots  
813 for the GLMs models, the response variable for each graph are the predicted values of the  
814 model to that principal component (the model effect). All of the PCs fitted in the model

815 show a positive relationship, indicating that the probability of capture frequency of the  
816 individuals of two mice, increases with the presence of that variables. Therefore, the  
817 figure also shows in the “X” axis in parenthesis the variables with the higher loading  
818 scores in the ordination of this PCs.

819 **Fig. 6.** Ripley's bivariate K Analysis for interactions between the two *Peromyscus*. (a)  
820 Repulsion pattern between both species in all analyzed distances during the dry season.  
821 (b) Attraction from 6 - 12 m, and repulsion at 5, 10, and 14 m during the rainy season.  
822 Black solid line represent the Ripley's K bivariate pattern; red dashed lines represent the  
823 95% CI; blue solid line shows the null hypothesis.

824

825

826

827

828

829

830

831

832

833

834

835

836

837

838

839

840

841

842

843

844 **Fig. 1**

845

846

847

848

849

850

851

852

853

854

855

856

857

858

859

860

861

862

863

864

865

866

867

868

869

870

871

872

873

874

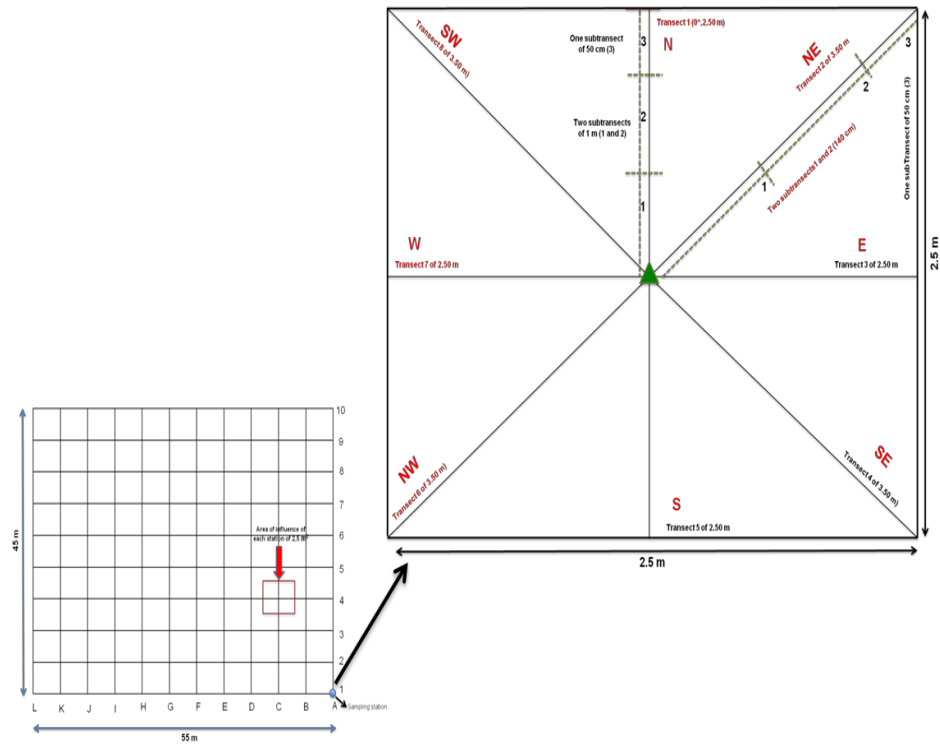

875  
876  
877  
878  
879  
880

**Fig. 2**

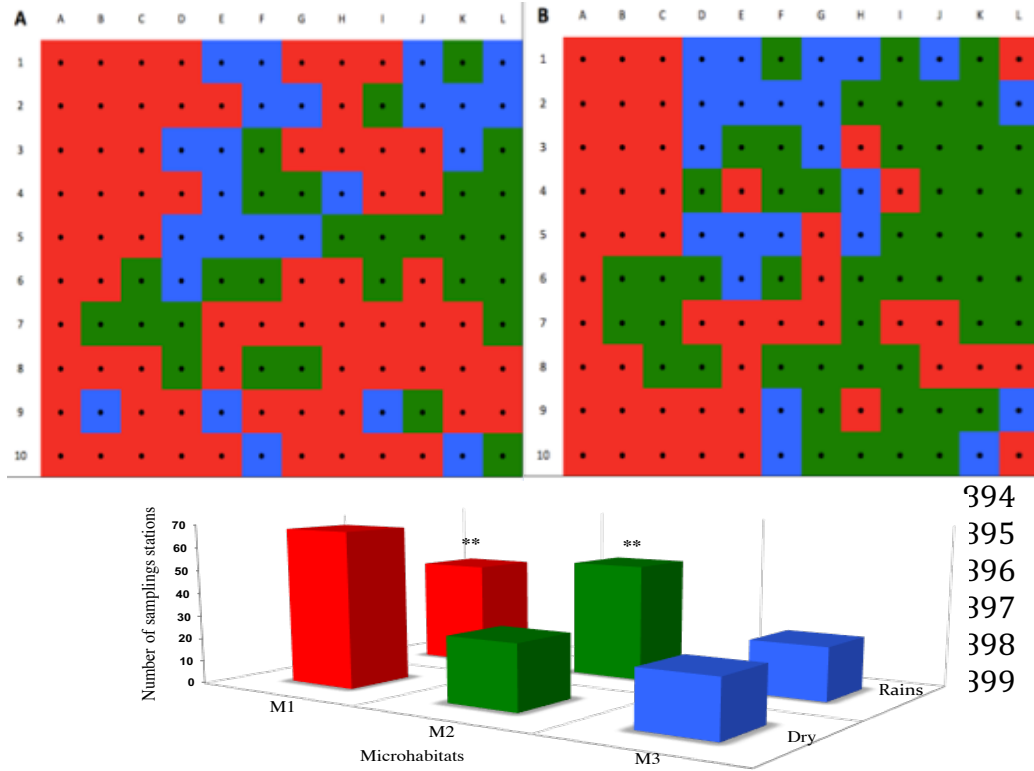

394  
395  
396  
397  
398  
399



900  
 901  
 902  
 903  
 904  
 905  
 906  
 907  
 908  
 909  
 910  
 911  
 912  
 913  
 914  
 915  
 916  
 917  
 918  
 919  
 920  
 921  
 922  
 923  
 924  
 925  
 926  
 927  
 928  
 929

**Fig. 3**

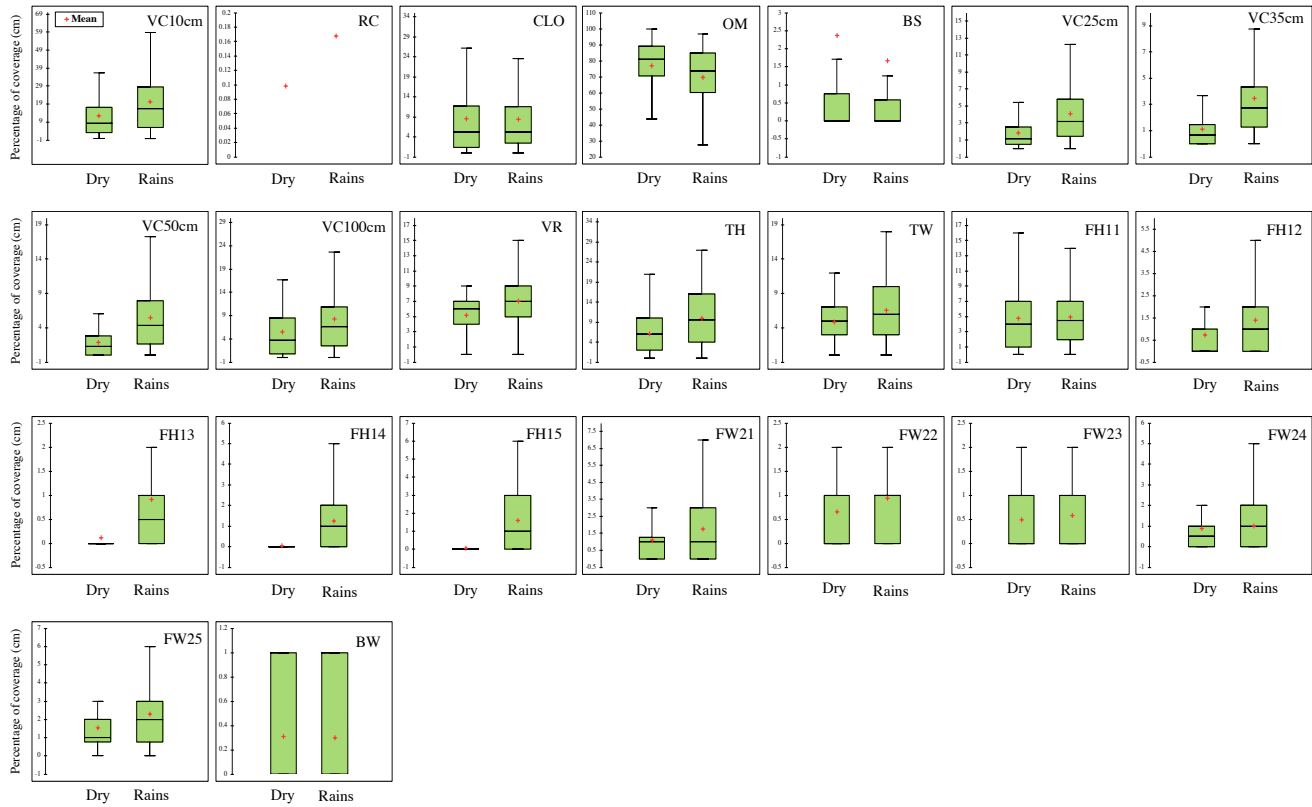

930  
931  
932  
933  
934  
935  
936  
937  
938  
939  
940  
941  
942  
943  
944  
945  
946  
947  
948  
949  
950  
951  
952  
953  
954  
955  
956  
957  
958  
959  
960  
961  
962  
963  
964  
965  
966  
967  
968  
969  
970  
971  
972  
973  
974  
975  
976  
977  
978

**Fig. 4**

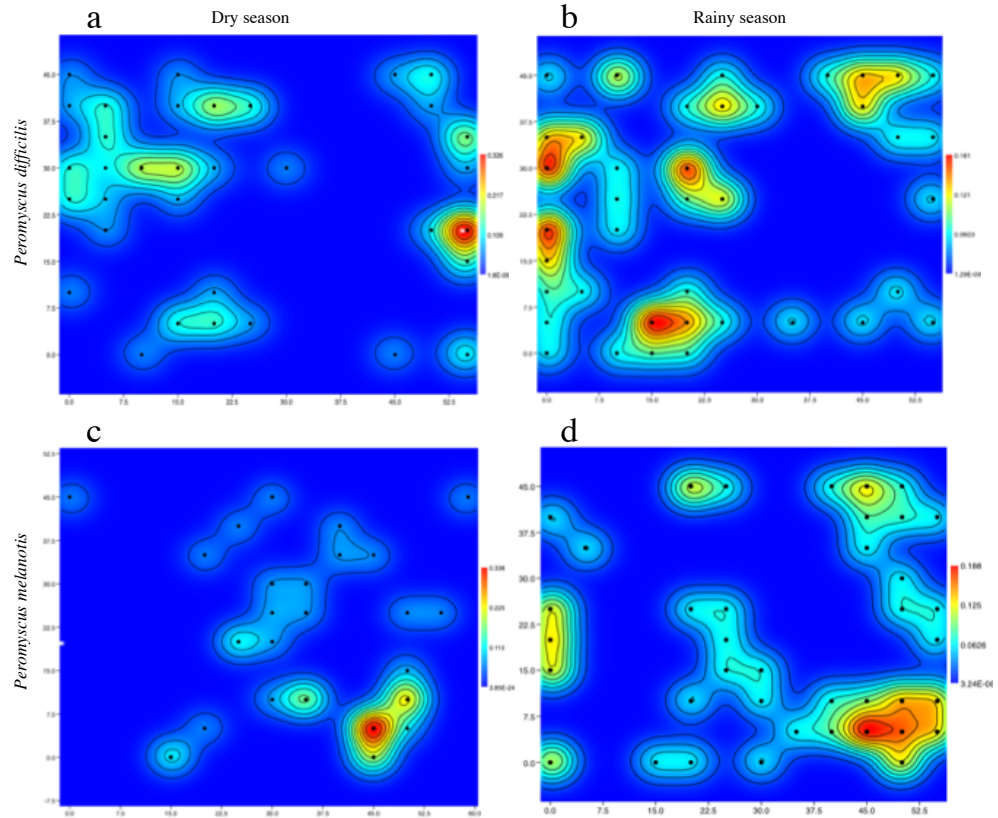

979  
980  
981  
982

**Fig. 5**

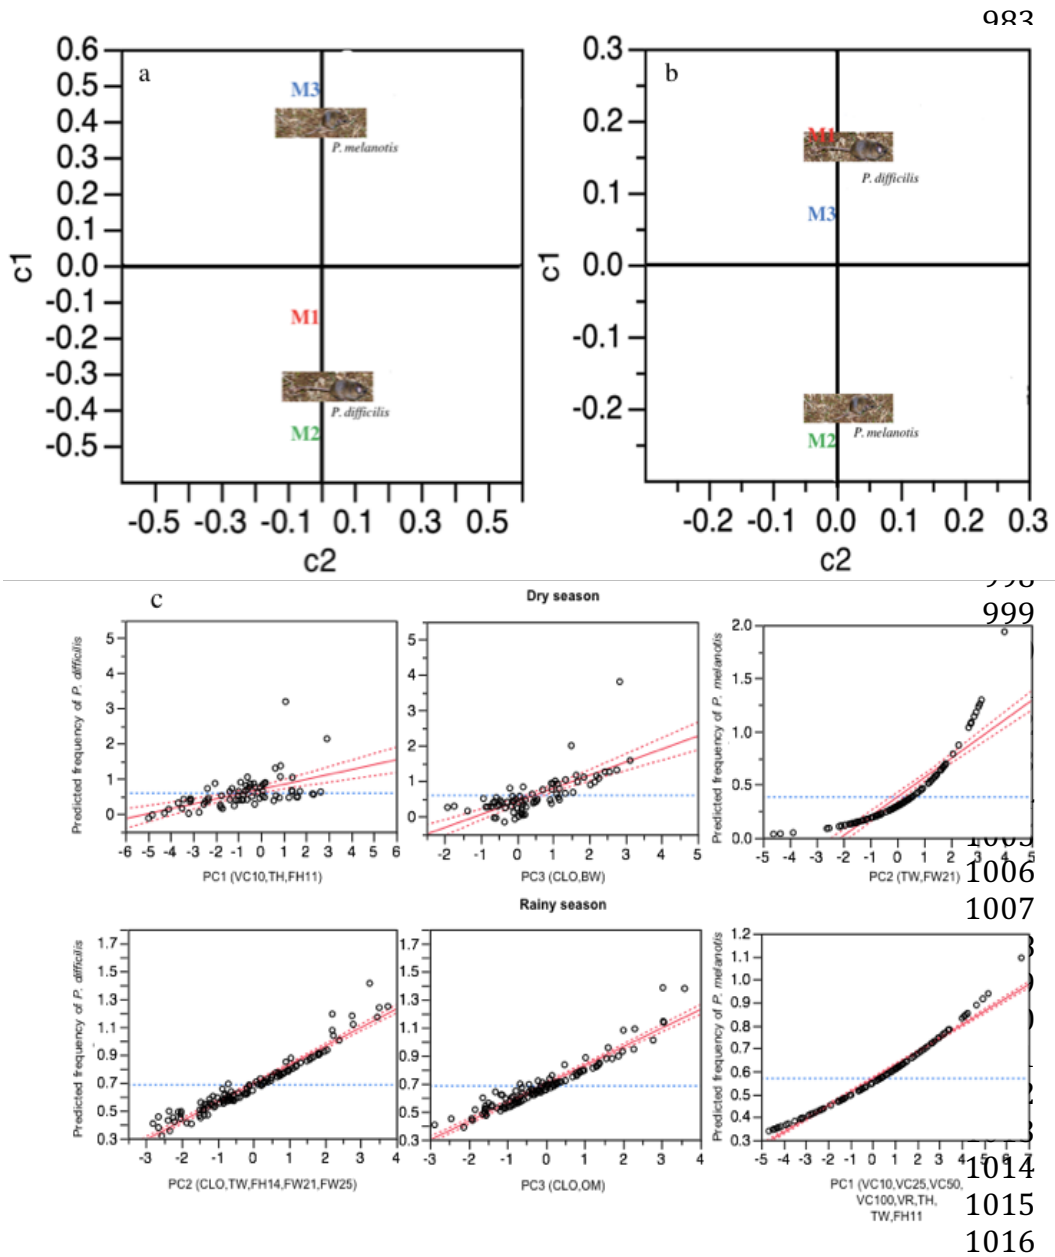

1017  
1018  
1019  
1020  
1021  
1022  
1023  
1024  
1025  
1026  
1027

1028  
1029 **Fig. 6**

1030  
1031  
1032  
1033  
1034  
1035  
1036  
1037  
1038  
1039  
1040  
1041  
1042  
1043  
1044  
1045  
1046  
1047  
1048  
1049  
1050  
1051  
1052  
1053  
1054  
1055  
1056  
1057  
1058  
1059  
1060  
1061  
1062  
1063  
  
1064  
1065  
1066  
1067  
1068  
1069  
1070  
1071  
1072  
1073  
1074  
1075

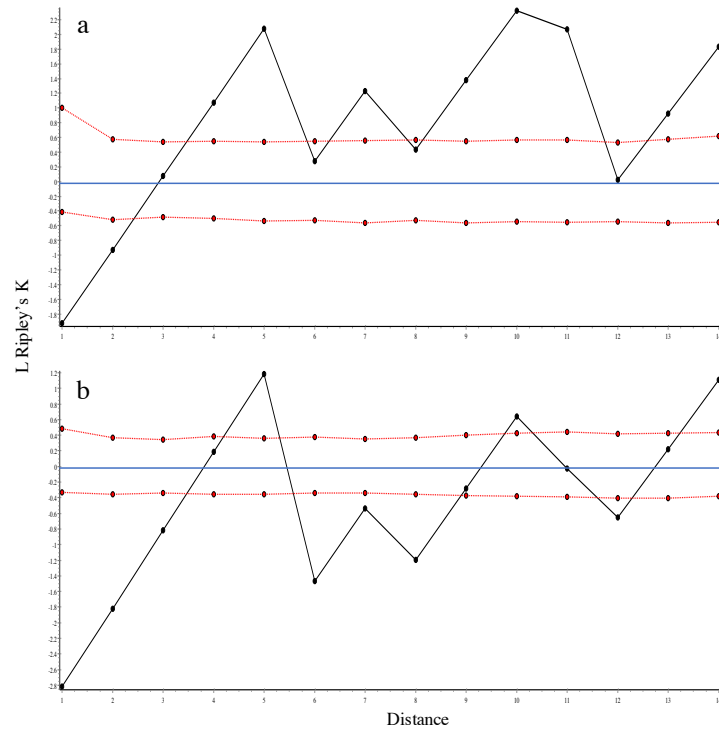

1076 **Table 1.** Environmental variables used to measure the horizontal and vertical structure of microhabitat  
 1077 at each sampling station, showing its ecological interpretation (kind or resource type) for both species  
 1078 of *Peromyscus*.

| Variable code | Predation                                    |         | Resources      |      |                           |           |                |
|---------------|----------------------------------------------|---------|----------------|------|---------------------------|-----------|----------------|
|               | Diminished risk                              | Refuges | Breeding Space | Food | Temporal food and refuges | Permanent | Resting places |
|               | Vegetation Cover (cm)                        |         |                |      |                           |           |                |
| VC10          | X                                            |         |                | X    | X                         |           | X              |
| VC25          | X                                            |         | X              | X    | X                         |           | X              |
| VC35          | X                                            |         | X              | X    | X                         |           | X              |
| VC50          | X                                            |         | X              | X    | X                         |           | X              |
| VC100         | X                                            |         | X              | X    | X                         |           | X              |
|               | Frequency of Herbaceous Plants (cm)*         |         |                |      |                           |           |                |
| FH11          | X                                            |         | X              | X    | X                         |           | X              |
| FH12          | X                                            |         | X              | X    | X                         |           | X              |
| FH13          | X                                            |         | X              | X    | X                         |           | X              |
| FH14          | X                                            |         | X              | X    | X                         |           | X              |
| FH15          | X                                            |         | X              | X    | X                         |           | X              |
|               | Frequency of Woody Plants (cm)*              |         |                |      |                           |           |                |
| FW21          | X                                            | X       | X              | X    | X                         | X         | X              |
| FW22          | X                                            | X       | X              | X    | X                         | X         | X              |
| FW23          | X                                            | X       | X              | X    | X                         | X         | X              |
| FW24          | X                                            | X       | X              | X    | X                         | X         | X              |
| FW25          | X                                            | X       | X              | X    | X                         | X         | X              |
|               | Species Vegetation Richness                  |         |                |      |                           |           |                |
| VR            | X                                            | X       | X              | X    | X                         | X         | X              |
|               | Total of Herbaceous Plants                   |         |                |      |                           |           |                |
| TH            | X                                            |         | X              | X    | X                         |           | X              |
|               | Total of Woody Plants                        |         |                |      |                           |           |                |
| TW            | X                                            | X       | X              | X    | X                         | X         | X              |
|               | Rocks                                        |         |                |      |                           |           |                |
| RC            | X                                            | X       | X              |      |                           | X         | X              |
|               | Organic Matter (litter, twigs, small trunks) |         |                |      |                           |           |                |
| OM            |                                              |         |                | X    | X                         |           |                |
|               | Bare Soil                                    |         |                |      |                           |           |                |
| BS            |                                              |         |                |      | X                         |           |                |
|               | Coverage of Logs (stumps, fallen trunks)     |         |                |      |                           |           |                |
| CLO           | X                                            | X       | X              |      |                           | X         | X              |
|               | Numbers of Burrows                           |         |                |      |                           |           |                |
| BW            | X                                            | X       | X              |      |                           | X         | X              |

1079

1080 \* = Frequencies of plant types (FH, FW) involve the same heights as in VC.

1081

1082

1083

1084

1085 **Table 2.** Normality (**NOR**) tests for 22 variables (**VAR**) of microhabitat, and  
 1086 comparisons<sup>abc</sup> (**COM**) for average values between the dry (**DRY**) and rainy (**RAINS**)  
 1087 seasons, respectively. Variable names in Table 1.  
 1088

| VAR         | NOR    |        | COM          | VAR          | NOR    |              | COM          | VAR         | NOR          |             | COM          |
|-------------|--------|--------|--------------|--------------|--------|--------------|--------------|-------------|--------------|-------------|--------------|
|             | DRY    | RAINS  |              |              | DRY    | RAINS        |              |             | DRY          | RAINS       |              |
| <b>BS</b>   | 0.0001 | 0.0001 | <i>1.0</i>   | <b>VC100</b> | 0.002  | 0.003        | 0.0001       | <b>TW</b>   | <i>0.143</i> | <i>0.08</i> | 0.0004       |
| <b>CLO</b>  | 0.0001 | 0.0001 | <i>0.972</i> | <b>VR</b>    | 0.006  | <i>0.082</i> | 0.0001       | <b>FW21</b> | 0.0001       | 0.0001      | 0.004        |
| <b>OM</b>   | 0.010  | 0.034  | 0.0001       | <b>TH</b>    | 0.0001 | <i>0.072</i> | 0.0001       | <b>FW22</b> | 0.0001       | 0.0001      | 0.026        |
| <b>RC</b>   | 0.0001 | 0.0001 | <i>0.432</i> | <b>FH11</b>  | 0.015  | 0.028        | <i>0.658</i> | <b>FW23</b> | 0.0001       | 0.0001      | <i>0.875</i> |
| <b>VC10</b> | 0.002  | 0.041  | 0.0001       | <b>FH12</b>  | 0.0001 | 0.0001       | 0.001        | <b>FW24</b> | 0.0001       | 0.0001      | <i>0.378</i> |
| <b>VC25</b> | 0.009  | 0.003  | 0.0001       | <b>FH13</b>  | 0.0001 | 0.0001       | 0.0001       | <b>FW25</b> | 0.0001       | 0.001       | 0.0001       |
| <b>VC35</b> | 0.0001 | 0.002  | 0.0001       | <b>FH14</b>  | 0.0001 | 0.0001       | 0.0001       | <b>BW</b>   | 0.0001       | 0.0001      | 1            |
| <b>VC50</b> | 0.0001 | 0.019  | 0.0001       | <b>FH15</b>  | 0.0001 | 0.0001       | 0.0001       |             |              |             |              |

1089

1090 Parametric: <sup>a</sup>Kolmogorov-Smirnov; <sup>b</sup>Student for two samples; non-parametric: <sup>c</sup>Wilcoxon). The *p*-values in italics do  
 1091 not reject normality (*p* = 0.05), or do not indicate significant differences between pluvial seasons.

1092

1093

1094

1095

1096

1097

1098

1099

1100

1101

1102

1103

1104

1105

1106

1107 **Table 3.** Nearest Neighbor Analysis for both species of *Peromyscus*, it shows the mean  
 1108 distance in which individuals from both *Peromyscus* are segregated. R-value indicates  
 1109 how the observed distribution deviates from random. Clustered points give  $R < 1$ , Poisson  
 1110 patterns give  $R \sim 1$ , while overdispersed points give  $R > 1$ .

1111

1112

|                | Dry season               |                     | Rain season              |                         |
|----------------|--------------------------|---------------------|--------------------------|-------------------------|
|                | <i>P. difficilis</i>     | <i>P. melanotis</i> | <i>P. difficilis</i>     | <i>P. melanotis</i>     |
| Points         | 57                       | 39                  | 58                       | 52                      |
| Mean distance  | 1.40                     | 2.39                | 1.67                     | 2.09                    |
| <i>R</i>       | 0.42                     | 0.77                | 0.55                     | 0.64                    |
| <i>P</i> value | $1.1263 \times 10^{-16}$ | 0.006               | $8.6577 \times 10^{-11}$ | $8.7708 \times 10^{-7}$ |
| Point pattern  | Clustering               | Clustering          | Clustering               | Clustering              |

1118

1119

1120

1121

1122

1123

1124

1125

1126

1127

1128

1129

1130

1131

1132 **Table 4.** Principal components used as effect model in the GLMs analysis for both

1133 seasons. Red colors represent the variables that have the major eigenfactors to the

1134 ordination of the components.

1135

1136

1137

1138

1139

1140

1141

1142

1143

1144

1145

1146

1147

1148

1149

1150

1151

1152

1153

1154

1155

| Variables | Dry season |        |        | Rainy season |        |        |
|-----------|------------|--------|--------|--------------|--------|--------|
|           | PC1        | PC2    | PC3    | PC1          | PC2    | PC3    |
| VC10      | 0.713      | -0.388 | -0.134 | 0.659        | -0.179 | -0.374 |
| RC        | -0.145     | -0.055 | -0.110 | 0.014        | 0.062  | 0.034  |
| CLO       | 0.030      | 0.118  | 0.828  | -0.153       | 0.411  | -0.583 |
| OM        | -0.604     | 0.303  | -0.487 | -0.499       | -0.122 | 0.775  |
| BS        | 0.130      | -0.187 | 0.112  | -0.028       | 0.154  | -0.328 |
| VC25      | 0.415      | 0.280  | 0.034  | 0.658        | -0.061 | 0.237  |
| VC32      | 0.287      | 0.184  | 0.052  | 0.580        | -0.003 | -0.126 |
| VC50      | 0.523      | 0.107  | 0.078  | 0.669        | -0.173 | -0.030 |
| VC100     | 0.335      | 0.408  | 0.052  | 0.656        | -0.053 | 0.107  |
| VR        | 0.762      | 0.251  | -0.269 | 0.776        | 0.380  | 0.058  |
| TH        | 0.837      | -0.430 | -0.131 | 0.874        | -0.319 | -0.076 |
| TW        | 0.520      | 0.684  | -0.168 | 0.615        | 0.711  | 0.270  |
| FH11      | 0.784      | -0.394 | -0.214 | 0.678        | 0.007  | -0.228 |
| FH12      | 0.573      | -0.345 | 0.176  | 0.548        | -0.278 | 0.256  |
| FH13      | 0.247      | 0.073  | 0.113  | 0.463        | -0.260 | 0.067  |
| FH14      | 0.149      | -0.186 | -0.023 | 0.580        | -0.530 | -0.043 |
| FH14      | 0.080      | 0.117  | -0.236 | 0.481        | -0.267 | -0.019 |
| FW21      | 0.127      | 0.510  | -0.394 | 0.342        | 0.603  | 0.311  |
| FW22      | 0.015      | 0.064  | -0.105 | 0.266        | 0.212  | 0.416  |
| FW23      | 0.199      | 0.256  | -0.228 | 0.196        | 0.366  | -0.241 |
| FW24      | 0.424      | 0.359  | 0.195  | 0.337        | 0.165  | 0.159  |
| FW25      | 0.515      | 0.366  | 0.380  | 0.494        | 0.469  | 0.026  |
| BW        | -0.105     | 0.249  | 0.557  | -0.170       | 0.332  | -0.218 |



1156

1157 **Table 5.** Generalized Linear Models constructed with the Principal Components and the  
 1158 frequency of *P. difficilis* and *P. melanotis* for both seasons. The partition of resources by  
 1159 both species is observed at both seasons of the year. Different main components within  
 1160 each season explain the frequency of capture of each of the species. Also, the table is  
 1161 related to what type of microhabitat the new variables belong to (M1-M3). The goodness  
 1162 of fit tests are shown; Pearson and Deviance.

1163

| <i>P. difficilis</i> |          |           |              |         |                                    |                                    |
|----------------------|----------|-----------|--------------|---------|------------------------------------|------------------------------------|
| Dry season           |          |           |              |         |                                    |                                    |
| Term                 | Estimate | Std Error | L-R $\chi^2$ | P value | Pearson                            | Deviance                           |
| Intercept            | -0.97    | 0.15      | 55.73        | 0.0001  | $\chi^2 = 155.80$ ( $p = 0.0096$ ) | $\chi^2 = 123.56$ ( $p = 0.3210$ ) |
| PC1 = M2             | 0.11     | 0.05      | 5.53         | 0.0186  | AICc = 212.55                      |                                    |
| PC3 = M1             | 0.45     | 0.06      | 44.73        | 0.0001  |                                    |                                    |
| Rainy season         |          |           |              |         |                                    |                                    |
| Term                 | Estimate | Std Error | L-R $\chi^2$ | P value | Pearson                            | Deviance                           |
| Intercept            | -0.40    | 0.11      | 14.37        | 0.0002  | $\chi^2 = 168.56$ ( $p = 0.0008$ ) | $\chi^2 = 156.43$ ( $p = 0.0062$ ) |
| PC2 = M3             | 0.23     | 0.06      | 10.92        | 0.0009  | AICc = 286.76                      |                                    |
| PC3 = M1             | 0.26     | 0.07      | 10.95        | 0.0009  |                                    |                                    |
| <i>P. melanotis</i>  |          |           |              |         |                                    |                                    |
| Dry season           |          |           |              |         |                                    |                                    |
| Term                 | Estimate | Std Error | L-R $\chi^2$ | P value | Pearson                            | Deviance                           |
| Intercept            | -1.21    | 0.18      | 74.28        | 0.0001  | $\chi^2 = 237.65$ ( $p = 0.0001$ ) | $\chi^2 = 138.70$ ( $p = 0.0935$ ) |
| PC2 = M3             | 0.46     | 0.09      | 23.34        | 0.0001  | AICc = 204.47                      |                                    |
| Rainy season         |          |           |              |         |                                    |                                    |
| Term                 | Estimate | Std Error | L-R $\chi^2$ | P value | Pearson                            | Deviance                           |
| Intercept            | 0.60     | 0.12      | 28.15        | 0.0001  | $\chi^2 = 132.71$ ( $p = 0.13$ )   | $\chi^2 = 132.72$ ( $p = 0.13$ )   |
| PC1 = M2             | 0.10     | 0.04      | 4.47         | 0.0343  | AICc = 241.01                      |                                    |

1164

1165

1166

1167

1168

1169
